# Supplementary material
Source: publisher figshare collection journal article supplement (https://sage.figshare.com/ndownloader/files/14569463)

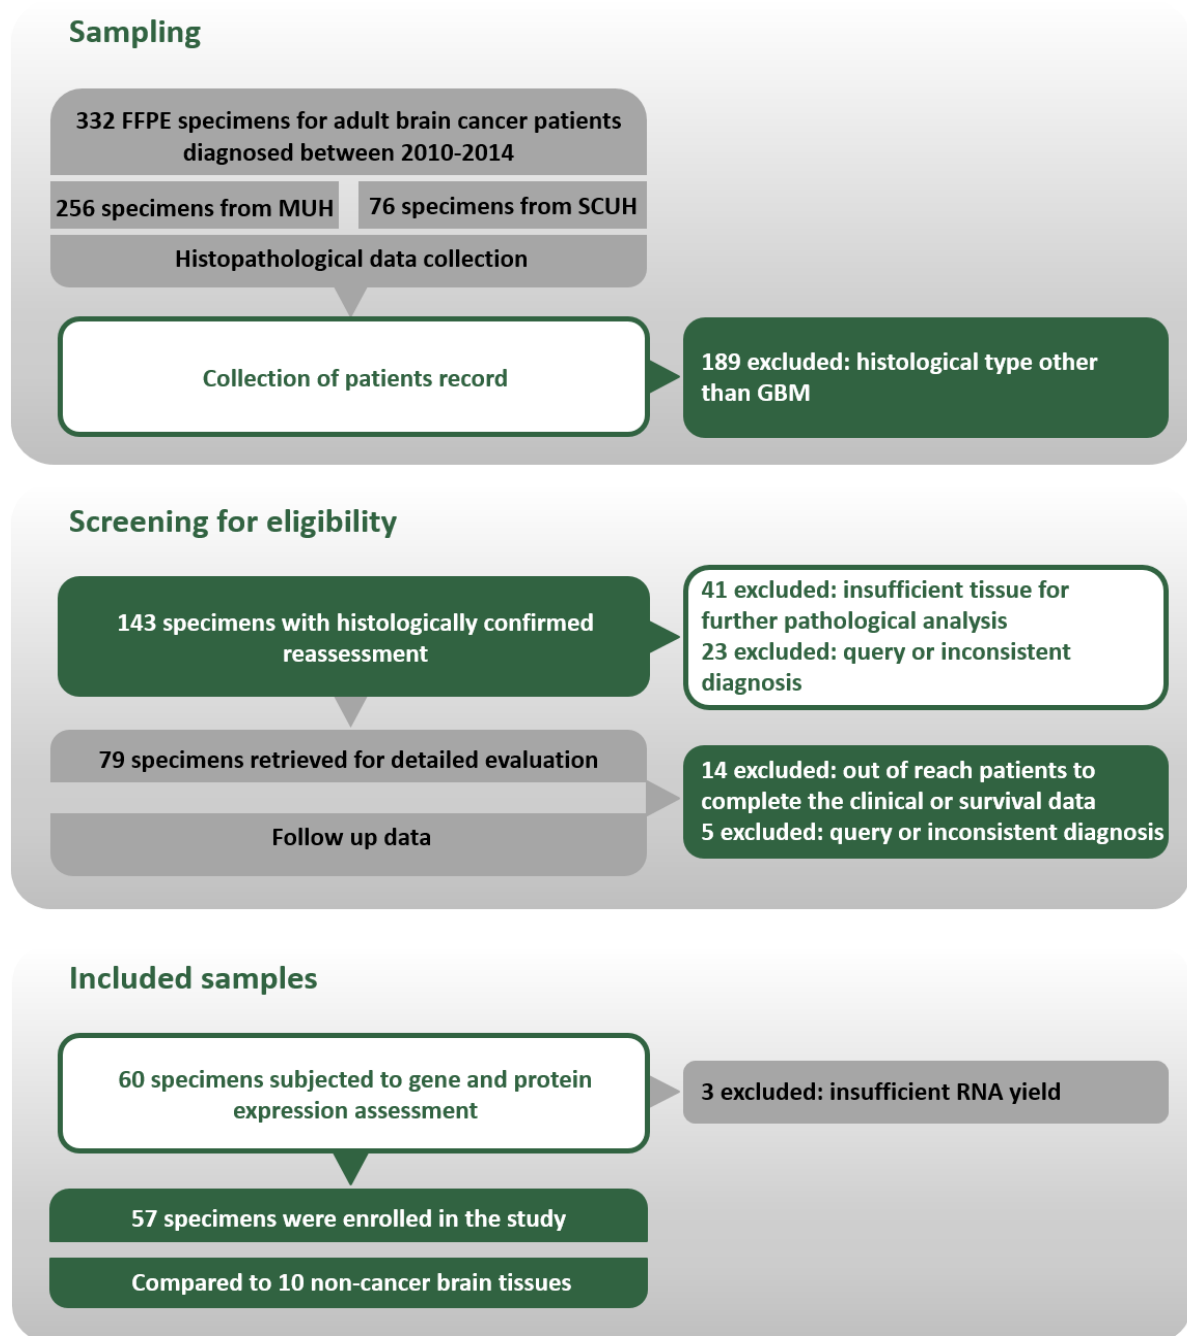

**Supplementary Figure 1**

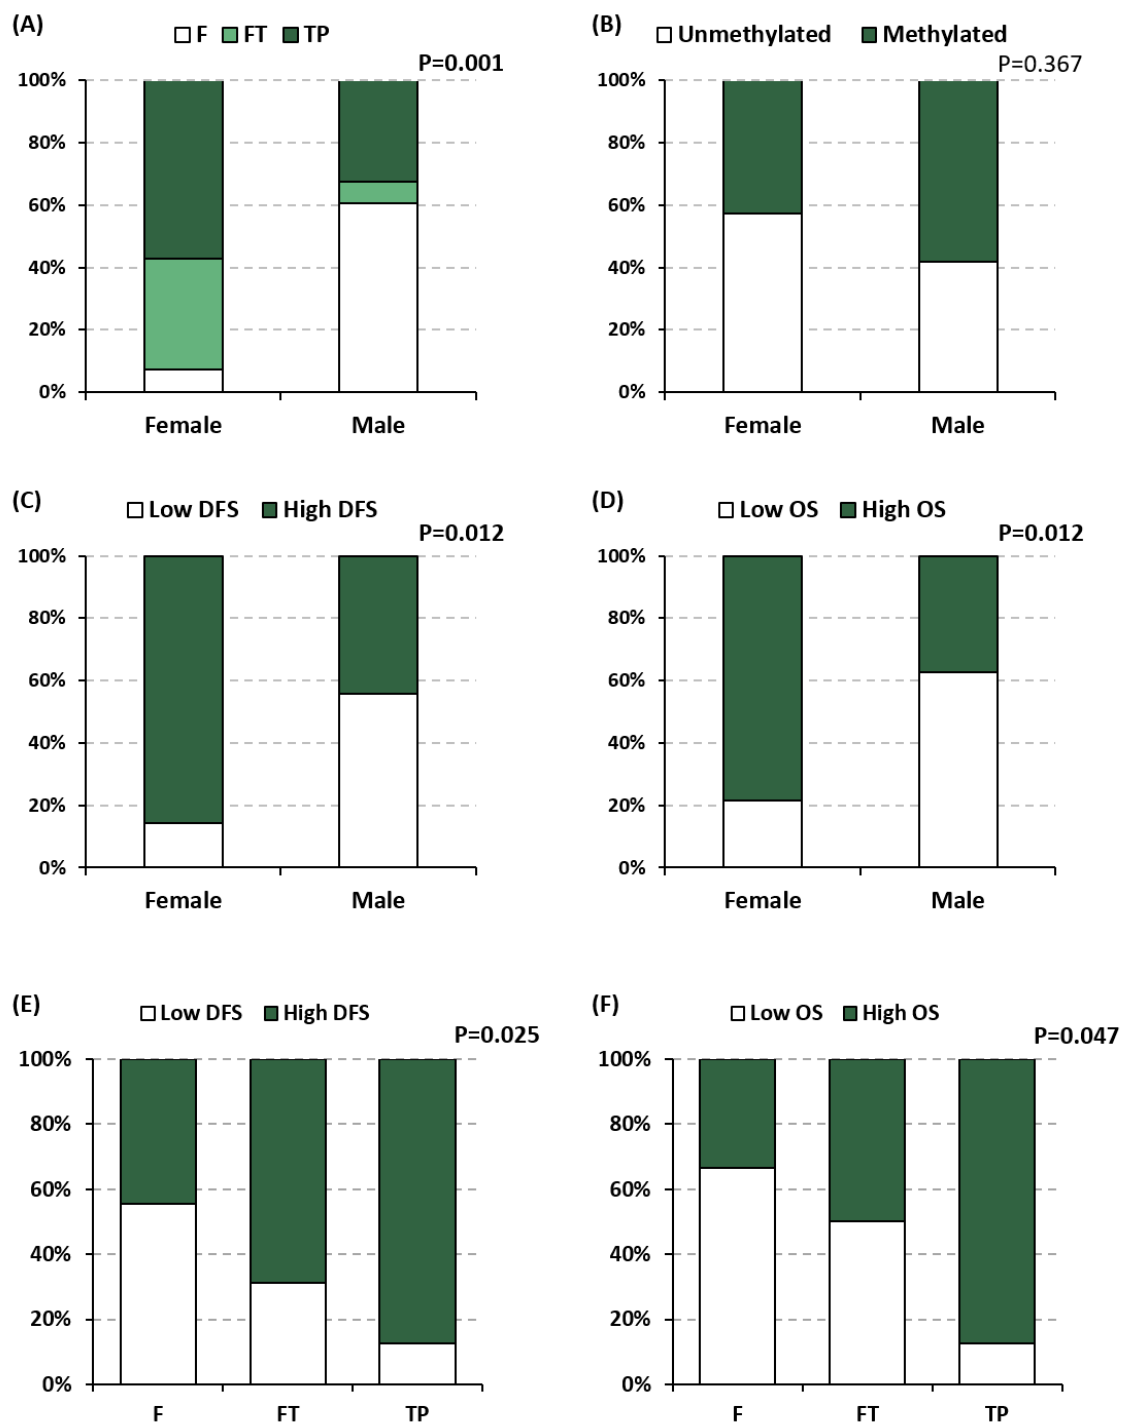

Supplementary Figure 2

Supplement: Supplementary file 1 [file 14569463]
